# Supplementary material for: Single-Cell Analysis of Contractile Forces in iPSC-Derived Cardiomyocytes: Paving the Way for Precision Medicine in Cardiovascular Disease
Source: MDPI journal article supplement (doi:10.3390/ijms241713416), 2023-08-30
Supplement: s1 [file s1]

## **Supplementary Materials.**

### **Instructions and Script to extract data from AFM measurements**

#### **Step 1: Install PyCharm**

PyCharm Community Edition, download and install it from the official JetBrains website.

#### **Step 2: Open PyCharm**

Launch PyCharm Community Edition after the installation is complete.

#### **Step 3: Create or Open a Project**

Create New Project: Click "New Project" to create a new Python project. Specify the project name and location.

Open Existing Project: If you already have a project, click "Open" and navigate to that project's folder.

#### **Step 4: Add main.py to Project Directory**

Drag and drop the main.py file into the PyCharm project directory.

Alternatively, you can manually copy and paste main.py into the project directory using your system's file explorer.

#### **Step 5: Install Required Packages**

Open the terminal inside PyCharm (usually at the bottom of the PyCharm window) and install the necessary packages using pip install.

#### **Step 6: Check Run Configuration**

Go to the top-right corner of the PyCharm window, find the run configurations dropdown, and click "Edit Configurations" (it looks like a gear icon).

Ensure that the "Script path" points to your main.py file.

Click "Apply" and then "OK".

#### **Step 7: Run the Script**

Right-click on the main.py file in the project explorer on the left side of PyCharm and choose "Run 'main'".

Alternatively, you can click the "Run" button at the top-right corner of the PyCharm window.

## Script

```
import tkinter.filedialog as filedialog
import tkinter as tk
from NSFOpen.read import read as afmreader
from pandas import DataFrame, ExcelWriter
from matplotlib.pyplot import plot, show
from matplotlib.backends.backend_tkagg import FigureCanvasTkAgg
from matplotlib.figure import Figure
from numpy import mean, append
from scipy.signal import find_peaks

global DATA

def data_automation():
    global DATA
    filename = input_entry.get()
    alldata = afmreader(filename, verbose=False).data
    # Reading data
    adhesion_data = alldata['Spec']['Pause Forward']['Deflection']
    friction_data = alldata['Spec']['Pause Forward']['Friction force']
    adhesion_force = adhesion_data[0][int(float(set_range_min.get())) *
                                     1000: int(float(set_range_max.get())) * 1000] * 1e9
    friction_force = friction_data[0][int(float(set_range_min.get())) *
                                     1000: int(float(set_range_max.get())) * 1000]
    # Saving data
    d = {'Time (sec)': [i / 1000 for i in range(int(float(set_range_min.get())) * 1000,
                                               int(float(set_range_max.get())) * 1000)]
         , 'Adhesion Data': adhesion_force,
         'Friction Data': friction_force}
    df_1 = DataFrame(data=d)
    dict_2 = {"Peak height (nN)": DATA["Adhesion"]["peak_heights"],
             'Peak widths (sec)': DATA["Adhesion"]["peak_widths"] / 1000,
             'Time b/n Pulses (sec)': DATA["Adhesion"]["time_bn_peaks"] / 1000,
             'Peak time (sec)': DATA["Adhesion"]["peaks"] / 1000, }
    df_2 = DataFrame(data=dict_2)

    dict_3 = {"Peak height (mV)": DATA["friction"]["peak_heights"],
             'Peak widths (sec)': DATA["friction"]["peak_widths"] / 1000,
             'Time b/n Pulses (sec)': DATA["friction"]["time_bn_peaks"] / 1000,
             'Peak time (sec)': DATA["friction"]["peaks"] / 1000,}

    df_3 = DataFrame(data=dict_3)
    file_path = filename[0:-4] + "DATA.xlsx"
    file_path.replace("\\", "/")
```

```

print(file_path)
writer2 = ExcelWriter(file_path)
df_1.to_excel(writer2, sheet_name='Raw Data', index=False)
df_2.to_excel(writer2, sheet_name='Adhesion Force Data', index=False)
df_3.to_excel(writer2, sheet_name='Friction Force Data', index=False)
writer2.save()

def input_field():
    global DATA
    input_path = tk.filedialog.askopenfilename()
    input_entry.delete(1, tk.END) # Remove current text in entry
    input_entry.insert(0, input_path) # Insert the 'path'
    filename = input_entry.get()
    alldata = afmreader(filename, verbose=False).data
    # Reading data
    adhesion_data = alldata['Spec']['Pause Forward']['Deflection']
    adhesion_force = adhesion_data[0]

    set_range_min.insert(0, '0')
    set_range_max.insert(0, str(len(adhesion_force) / 1000))
    DATA = {}

def start_plot():
    filename = input_entry.get()
    alldata = afmreader(filename, verbose=False).data
    # Reading data
    adhesion_data = alldata['Spec']['Pause Forward']['Deflection']
    friction_data = alldata['Spec']['Pause Forward']['Friction force']
    adhesion_force = adhesion_data[0][int(float(set_range_min.get())) *
                                     1000: int(float(set_range_max.get())) * 1000] * 1e9
    friction_force = friction_data[0][int(float(set_range_min.get())) *
                                     1000: int(float(set_range_max.get())) * 1000]

    ax.clear()
    ax.set_title("Normal Force")
    ax.set_xlabel("Time(mSec)")
    ax.set_ylabel("Force (nN)")

    ax.grid(b=True, which='major', color='#666666', linestyle='-')
    ax.minorticks_on()
    ax.grid(b=True, which='minor', color='#666666', linestyle='-', alpha=0.2)

    ax2.clear()
    ax2.set_title("Friction Force")
    ax2.set_xlabel("Time(mSec)")

```

```

ax2.set_ylabel("Force (mV)")

ax.plot(adhesion_force, color="blue")
ax2.plot(friction_force, color="red")

ax2.grid(b=True, which='major', color='#666666', linestyle='-')
ax2.minorticks_on()
ax2.grid(b=True, which='minor', color='#666666', linestyle='-', alpha=0.2)
canvas.draw()

def find_peaks_data():
    global DATA
    filename = input_entry.get()
    alldata = afmreader(filename, verbose=False).data
    # Reading data
    adhesion_data = alldata['Spec']['Pause Forward']['Deflection']
    friction_data = alldata['Spec']['Pause Forward']['Friction force']
    adhesion_force = adhesion_data[0][int(float(set_range_min.get())) *
                                     1000: int(float(set_range_max.get())) * 1000] * 1e9
    friction_force = friction_data[0][int(float(set_range_min.get())) *
                                     1000: int(float(set_range_max.get())) * 1000]

    adhesion_force = adhesion_force - mean(adhesion_force)
    friction_force = friction_force - mean(friction_force)
    if abs(mean(adhesion_force) - max(adhesion_force)) > abs(mean(adhesion_force) -
min(adhesion_force)):
        peak_height_ad = (max(adhesion_force) - mean(adhesion_force)) / 2
    else:
        adhesion_force = -adhesion_force
        peak_height_ad = (max(adhesion_force) - mean(adhesion_force)) / 2

    if abs(mean(friction_force) - max(friction_force)) > abs(mean(friction_force) - min(friction_force)):
        peak_height_fr = (max(friction_force) - mean(friction_force)) / 2
    else:
        friction_force = -friction_force
        peak_height_fr = (max(friction_force) - mean(friction_force)) / 3

    ax.clear()
    ax2.clear()
    peaks_ad, props_ad = find_peaks(adhesion_force, height=peak_height_ad, distance=300,
prominence=peak_height_ad,
                                   width=20)
    ax.plot(adhesion_force, color="blue")
    ax2.plot(friction_force, color="red")
    ax.plot(peaks_ad, adhesion_force[peaks_ad], "x")

```

```

ax.grid(b=True, which='major', color='#666666', linestyle='-')
ax.minorticks_on()
ax.grid(b=True, which='minor', color='#666666', linestyle='-', alpha=0.2)
ax.set_title("Normal Force")
ax.set_xlabel("Time(mSec)")
ax.set_ylabel("Force (nN)")
ax.vlines(x=peaks_ad, ymin=adhesion_force[peaks_ad] - props_ad["prominences"],
          ymax=adhesion_force[peaks_ad], color="C1")
ax.hlines(y=props_ad["width_heights"], xmin=props_ad["left_ips"],
          xmax=props_ad["right_ips"], color="C1")

peaks_fr, props_f = find_peaks(friction_force, height=peak_height_fr, distance=300,
prominence=peak_height_fr,
                              width=20)
ax2.plot(peaks_fr, friction_force[peaks_fr], "x")
ax2.set_title("Friction Force")
ax2.set_xlabel("Time(mSec)")
ax2.set_ylabel("Force (mV)")
ax2.grid(b=True, which='major', color='#666666', linestyle='-')
ax2.minorticks_on()
ax2.grid(b=True, which='minor', color='#666666', linestyle='-', alpha=0.2)

ax2.vlines(x=peaks_fr, ymin=friction_force[peaks_fr] - props_f["prominences"],
          ymax=friction_force[peaks_fr], color="C1")
ax2.hlines(y=props_f["width_heights"], xmin=props_f["left_ips"],
          xmax=props_f["right_ips"], color="C1")

DATA = {"Adhesion": {"peak_heights": -adhesion_force[peaks_ad] + props_ad["prominences"],
                    "peak_widths": -props_ad["left_ips"] + props_ad["right_ips"],
                    "time_bn_peaks": append(peaks_ad[1:], 0) - append(peaks_ad[0:-1], 0),
                    "peaks": peaks_ad, },
        "friction": {"peak_heights": -friction_force[peaks_fr] + props_f["prominences"],
                    "peak_widths": -props_f["left_ips"] + props_f["right_ips"],
                    "time_bn_peaks": append(peaks_fr[1:], 0) - append(peaks_fr[0:-1], 0),
                    "peaks": peaks_fr, }}
canvas.draw()

def plot():
    global DATA
    filename = input_entry.get()
    alldata = afmreader(filename, verbose=False).data
    # Reading data
    adhesion_data = alldata['Spec']['Pause Forward']['Deflection']
    friction_data = alldata['Spec']['Pause Forward']['Friction force']
    adhesion_force = adhesion_data[0][int(float(set_range_min.get())) *

```

```

        1000: int(float(set_range_max.get()) * 1000] * 1e9
friction_force = friction_data[0][int(float(set_range_min.get()) *
        1000: int(float(set_range_max.get()) * 1000]

plot(adhesion_force)
show()

def create_window():
    new_window = tk.Toplevel(main_window)
    return new_window

main_window = tk.Tk()
main_window.configure(background='light blue')
main_window.geometry('1000x900')
pw = tk.PanedWindow(main_window, orient='vertical')
main_window.resizable(False, True)
plotting_frame = tk.LabelFrame(pw, text='Real Time', bg='white', width=1000, height=550, bd=5,
relief=tk.SUNKEN)
controls_frame = tk.LabelFrame(pw, text='Controls', background='light grey', width=600, height=150)
output_frame = tk.LabelFrame(pw, text='Output', background='light grey', width=600, height=150)
input_frame = tk.LabelFrame(pw, text='Input', background='light grey', width=600, height=150)
# credit_frame = tk.LabelFrame(pw, text='Thank you!', background='light grey', width=600,
height=50)

controls_frame.grid(column=0, row=1, padx=20, pady=20)
plotting_frame.grid(column=0, row=2, padx=20, pady=20)
output_frame.grid(column=0, row=3, padx=20, pady=20)
input_frame.grid(column=0, row=0, padx=20, pady=20)
# credit_frame.grid(column=0, row=4, padx=20, pady=20)

input_path = tk.Label(input_frame, text="Input File Path:")
input_path.grid(column=0, row=0, padx=10)
input_entry = tk.Entry(input_frame, width=20)
input_entry.grid(column=1, row=0, padx=10)
browse1 = tk.Button(input_frame, text="Browse", command=input_field)
browse1.grid(column=2, row=0, padx=10)
set_range_min = tk.Entry(input_frame, width=10)
set_range_min.grid(column=4, row=0, padx=10)
set_range_max = tk.Entry(input_frame, width=10)
set_range_max.grid(column=5, row=0, padx=10)
range_path = tk.Label(input_frame, text="Set Range (min): [Min] [Max]")
range_path.grid(column=3, row=0, padx=10)

start_button = tk.Button(controls_frame, text='Start Monitoring', width=20, height=2, borderwidth=3,
        command=start_plot)

```

```

start_button.grid(row=0, column=0, padx=60)
analyze_button = tk.Button(controls_frame, text='Find Peaks', width=20, height=2, borderwidth=3,
                           command=find_peaks_data)

analyze_button.grid(row=0, column=1, padx=60)

# plot_graphs = tk.Button(controls_frame, text='Plot Graphs', width=20, height=2, borderwidth=3,
#                           command=plot)
# plot_graphs.grid(row=0, column=2, padx=60)

fig = Figure()
fig.set_tight_layout('tight')
ax = fig.add_subplot(211)
ax.set_title("Normal Force")
ax.set_xlabel("Time(mSec)")
ax.set_ylabel("Force (nN)")
ax.set_xlim(0, 30000)
ax.grid(b=True, which='major', color='#666666', linestyle='-')
ax.minorticks_on()
ax.grid(b=True, which='minor', color='#666666', linestyle='-', alpha=0.2)

ax2 = fig.add_subplot(212)
ax2.set_title("Friction Force")
ax2.set_xlabel("Time(mSec)")
ax2.set_ylabel("Force (mV)")
ax2.set_xlim(0, 30000)
ax2.grid(b=True, which='major', color='#666666', linestyle='-')
ax2.minorticks_on()
ax2.grid(b=True, which='minor', color='#666666', linestyle='-', alpha=0.2)

save_button = tk.Button(output_frame, text='Save', width=10, height=2, borderwidth=3,
                        command=data_automation)
save_button.pack(side=tk.LEFT, padx=26)

exit_button = tk.Button(output_frame, text='Close', width=10, height=2, borderwidth=3,
                        command=main_window.destroy)
exit_button.pack(side=tk.RIGHT, padx=26)

credit_path = tk.Label(output_frame, text="Created by: Gaitas group @ Mt Sinai", font=("Ariel", 10))
credit_path.pack(side=tk.BOTTOM)

canvas = FigureCanvasTkAgg(fig, master=plotting_frame)
canvas.get_tk_widget().place(x=10, y=0, width=900, height=500)
canvas.draw()

```

```
pw.add(input_frame)
pw.add(controls_frame)
pw.add(plotting_frame)
pw.add(output_frame)
pw.pack(fill='both', expand=True)

main_window.mainloop()
```



**Figure S1.** Example of the analysis output.

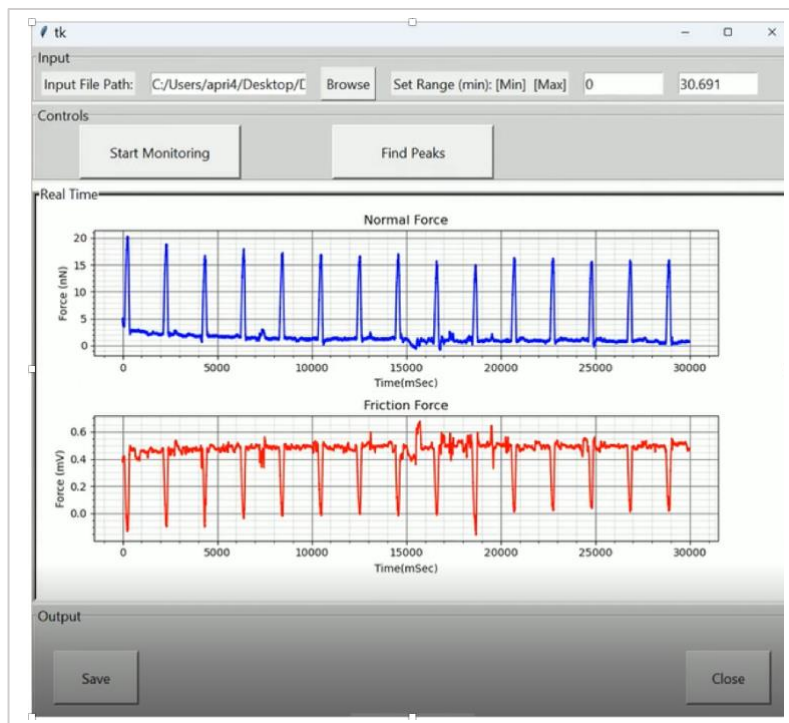

**Figure S2.** Example of analysis results saved to an Excel file.

[illegible]

**Video S1.** AFM cantilever and iPSC-CMs for normal and lateral force measurements. Screen recording of field of view showing AFM cantilever for normal and lateral force measurements and iPSC-CM beating during 0.5 Hz electrical stimulation.
